# Supplementary material for: An accurate many-body expansion potential energy surface for AlH2 (22A′) and quantum dynamics in Al(3P) + H2 (v0 = 0–3, j0 = 0, 2, 4, 6) collisions
Source: Royal Society of Chemistry journal article supplement (doi:10.1039/d2cp01802k), 2022-01-01
Supplement: d2cp01802k1.pdf [file d2cp01802k1.pdf]

**An accurate many-body expansion potential energy surface for  $\text{AlH}_2$  ( $2^2\text{A}'$ ) and quantum  
dynamics in  $\text{Al}$  ( $^3\text{P}$ ) +  $\text{H}_2$  ( $\nu_0 = 0 - 3, j_0 = 0, 2, 4, 6$ ) collisions**

Yanling Lü,<sup>a</sup> Chengyuan Zhang,<sup>a</sup> Hainan Wang,<sup>a</sup> Qiang Guo,<sup>\*a,b</sup> Yongqing Li,<sup>\*a,b</sup>

*<sup>a</sup>Department of Physics, Liaoning University, Shenyang 110036, China.*

*<sup>b</sup>Lvyuan Institute of Energy & Environmental Science and Technology, Liaoning University,  
Shenyang, 110036, China*

**Table. M1** (a) 150 linear coefficients for three-body energy term  $\text{AlH}_2$  ( $2^2A'$ ) PES.

| Coefficients                        | $\mathbf{P}^{(1)}$ | $\mathbf{P}^{(2)}$ | $\mathbf{P}^{(3)}$ |
|-------------------------------------|--------------------|--------------------|--------------------|
| $\mathbf{C}_1/\mathbf{a}_0^0$       | -5.2645723402      | 0.9364090238       | 0.2439914253       |
| $\mathbf{C}_2/\mathbf{a}_0^{-1}$    | -1.3370882184      | -0.7156072220      | -1.0863184069      |
| $\mathbf{C}_3/\mathbf{a}_0^{-1}$    | 0.6412507234       | 0.1618946726       | 0.0604060532       |
| $\mathbf{C}_4/\mathbf{a}_0^{-2}$    | -0.0337136603      | 0.1515072546       | -0.2227947715      |
| $\mathbf{C}_5/\mathbf{a}_0^{-2}$    | -0.0952725699      | -0.1105396447      | -0.0001123129      |
| $\mathbf{C}_6/\mathbf{a}_0^{-2}$    | -0.0283436316      | 0.0308378600       | -0.1658105677      |
| $\mathbf{C}_7/\mathbf{a}_0^{-2}$    | 0.0435446779       | -0.0271183872      | -0.0155561607      |
| $\mathbf{C}_8/\mathbf{a}_0^{-3}$    | 0.0895531777       | 0.0060441410       | -0.0407458297      |
| $\mathbf{C}_9/\mathbf{a}_0^{-3}$    | -0.0253911762      | -0.0114689183      | -0.0207636792      |
| $\mathbf{C}_{10}/\mathbf{a}_0^{-3}$ | -0.0108160030      | 0.0160696241       | -0.0748393861      |
| $\mathbf{C}_{11}/\mathbf{a}_0^{-3}$ | -0.0069740701      | 0.0470902522       | -0.0188551504      |
| $\mathbf{C}_{12}/\mathbf{a}_0^{-3}$ | 0.0049518140       | -0.0030179218      | 0.0022793686       |
| $\mathbf{C}_{13}/\mathbf{a}_0^{-3}$ | -0.0074783335      | -0.0048765991      | -0.0119744073      |
| $\mathbf{C}_{14}/\mathbf{a}_0^{-4}$ | -0.0049903525      | -0.0001394047      | -0.0071054690      |
| $\mathbf{C}_{15}/\mathbf{a}_0^{-4}$ | 0.0059354085       | -0.0001022154      | -0.0040033383      |
| $\mathbf{C}_{16}/\mathbf{a}_0^{-4}$ | 0.0118020604       | -0.0176414006      | -0.0004958594      |
| $\mathbf{C}_{17}/\mathbf{a}_0^{-4}$ | -0.0069338635      | -0.0002935665      | -10.5376362706     |
| $\mathbf{C}_{18}/\mathbf{a}_0^{-4}$ | -4.9620434398      | 9.9386943120       | -2.4316536635      |
| $\mathbf{C}_{19}/\mathbf{a}_0^{-4}$ | -3.3775975274      | 4.1108827767       | -1.1230160163      |
| $\mathbf{C}_{20}/\mathbf{a}_0^{-4}$ | -1.1158194738      | -2.7932817124      | -0.5684039907      |

---

|                   |                |               |               |
|-------------------|----------------|---------------|---------------|
| $C_{21}/a_0^{-4}$ | 3.7880003091   | 1.0091888013  | 1.6993788273  |
| $C_{22}/a_0^{-4}$ | -0.1529055633  | -0.4075010816 | -0.2758018836 |
| $C_{23}/a_0^{-5}$ | 0.1556542270   | 0.6218044898  | 0.5275078435  |
| $C_{24}/a_0^{-5}$ | 0.5584539412   | -0.1390809611 | -0.3110956121 |
| $C_{25}/a_0^{-5}$ | -0.0621968649  | -0.2029408786 | -0.0866024329 |
| $C_{26}/a_0^{-5}$ | 0.2585968231   | -0.0484810643 | 0.3024095903  |
| $C_{27}/a_0^{-5}$ | 0.3458067625   | 0.2284141817  | -0.2112172026 |
| $C_{28}/a_0^{-5}$ | -0.1005444439  | 0.0248774135  | -0.0612319874 |
| $C_{29}/a_0^{-5}$ | -0.0019752620  | -0.0337639598 | -0.0112001726 |
| $C_{30}/a_0^{-5}$ | 0.0290968845   | 0.0089509289  | -0.0125815940 |
| $C_{31}/a_0^{-5}$ | 0.0001225161   | 0.0215221063  | 0.0275089938  |
| $C_{32}/a_0^{-5}$ | 0.0670397818   | -0.0345626010 | 0.0380262612  |
| $C_{33}/a_0^{-5}$ | 0.0153560511   | -0.0065621008 | -0.0031318827 |
| $C_{34}/a_0^{-5}$ | -0.0011493839  | 5.2082825659  | 6.4976287278  |
| $C_{35}/a_0^{-6}$ | -15.2722963015 | -0.5954521635 | -1.6336044389 |
| $C_{36}/a_0^{-6}$ | 6.0328029987   | 3.0986407143  | 0.4230809217  |
| $C_{37}/a_0^{-6}$ | 0.0832506323   | -0.4553710188 | -1.4134350013 |
| $C_{38}/a_0^{-6}$ | 0.1455419822   | -1.7655674053 | -0.0543620285 |
| $C_{39}/a_0^{-6}$ | -0.0445696010  | -0.0949352476 | -0.1533874043 |
| $C_{40}/a_0^{-6}$ | 0.3682739829   | -0.0662530223 | -0.0191551165 |
| $C_{41}/a_0^{-6}$ | -0.0324927008  | 0.0837293315  | -0.0023001210 |
| $C_{42}/a_0^{-6}$ | 0.0018161648   | -0.0342828494 | 0.0053389801  |

---

|                   |               |               |               |
|-------------------|---------------|---------------|---------------|
| $C_{43}/a_0^{-6}$ | -0.0230925274 | -0.0589959472 | 0.0210750080  |
| $C_{44}/a_0^{-6}$ | -0.0383818977 | -0.0321331589 | 0.0175220226  |
| $C_{45}/a_0^{-6}$ | 0.0059346246  | 0.0031292433  | 0.0001678583  |
| $C_{46}/a_0^{-6}$ | -0.0003957156 | -0.0060117449 | -0.0046556677 |
| $C_{47}/a_0^{-6}$ | 0.0014267498  | 0.0021360740  | 0.0002271803  |
| $C_{48}/a_0^{-6}$ | 0.0024156870  | 0.0010734350  | -0.0040984993 |
| $C_{49}/a_0^{-6}$ | -0.0028454595 | 0.0038099546  | -0.0077787999 |
| $C_{50}/a_0^{-6}$ | 0.0026740970  | -0.0005597149 | -0.0002453801 |

**Table. M1** (b) 9 nonlinear parameters and 9 reference geometric distances

|                                   | $\mathbf{P}^{(1)}$ | $\mathbf{P}^{(2)}$ | $\mathbf{P}^{(3)}$ |
|-----------------------------------|--------------------|--------------------|--------------------|
| $\gamma_1^{(j)}/\alpha_0^{-1}$    | 0.9                | 0.5                | 0.5                |
| $\gamma_2^{(j)}/\alpha_0^{-1}$    | 0.2                | 0.9                | 0.9                |
| $\gamma_3^{(j)}/\alpha_0^{-1}$    | 0.5                | 0.5                | 0.5                |
| $R_{1,\text{ref}}^{(j)}/\alpha_0$ | 2.0                | 4.0                | 4.0                |
| $R_{2,\text{ref}}^{(j)}/\alpha_0$ | 3.0                | 3.0                | 3.0                |
| $R_{3,\text{ref}}^{(j)}/\alpha_0$ | 4.0                | 2.5                | 2.5                |
